# Supplementary material
Source: MDPI journal article supplement (https://www.mdpi.com/2073-4344/13/1/46)
Supplement: s1 [file s1 › catalysts-2062264-supplementary.pdf]

## Supporting Information

# Solvothermal Synthesis Of g-C<sub>3</sub>N<sub>4</sub> – TiO<sub>2</sub> Hybrid Photocatalyst With a Broad Activation Spectrum

Amit Imba, Vinod Kumar V and Hadas Mamane \*

School of Mechanical Engineering, Environmental Engineering Program, Faculty of Engineering, Tel Aviv University, Tel Aviv 69978, Israel  
Correspondence: hadasmg@tauex.tau.ac.il

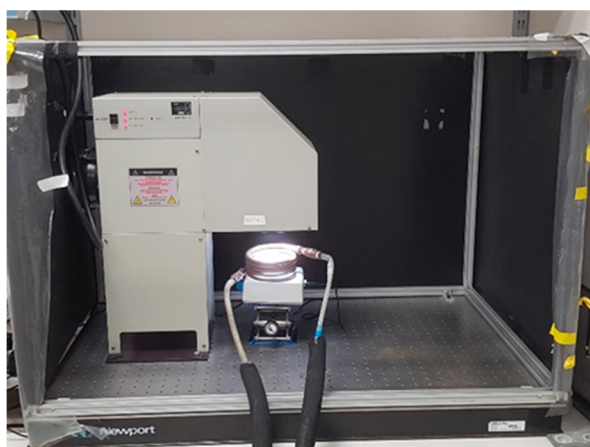

**Figure S1.** Newport solar simulator with 70 × 50-mm crystalline bowl surrounded by chiller coil. Inset: crystalline bowl with suspended catalyst after sonication in AG-25 solution.

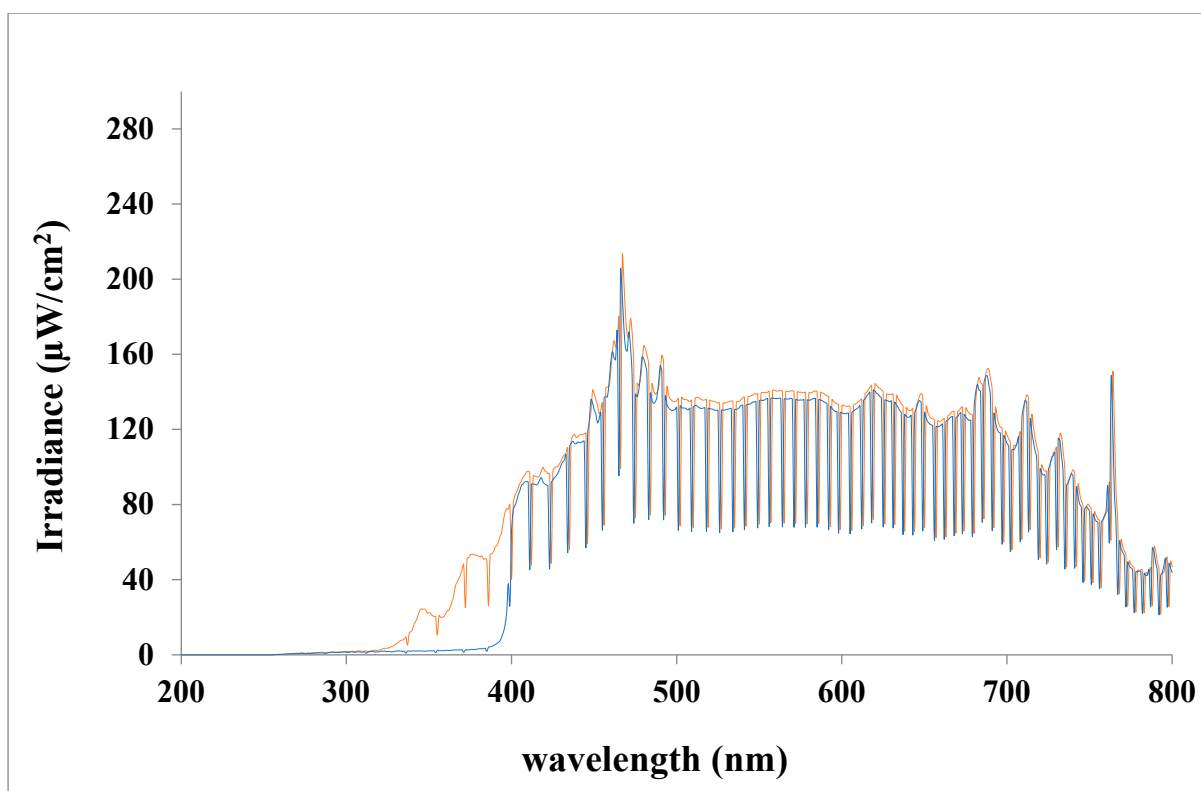

**Figure S2:** Spectral incident irradiance for solar simulator by a spectroradiometer. With (in blue) and without (in orange) LP400 UV filter

**Table S1:** Grain size and crystallographic directions of the different systems and phases.

| Catalyst                        | Phase                           | Crystallographic direction | System        | Chrystal size (nm) |
|---------------------------------|---------------------------------|----------------------------|---------------|--------------------|
| Composite                       | TiO <sub>2</sub>                | <200>                      | Anatase       | 326.6              |
|                                 |                                 | <101>                      |               | 208.0              |
|                                 | g-C <sub>3</sub> N <sub>4</sub> | <002>                      | Orthorhombic  | 8.4                |
| TiO <sub>2</sub>                |                                 | <200>                      | Anatase (94%) | 131.8              |
|                                 |                                 | <101>                      | Rutile (6%)   |                    |
| g-C <sub>3</sub> N <sub>4</sub> |                                 | <002>                      | Orthorhombic  | 55                 |

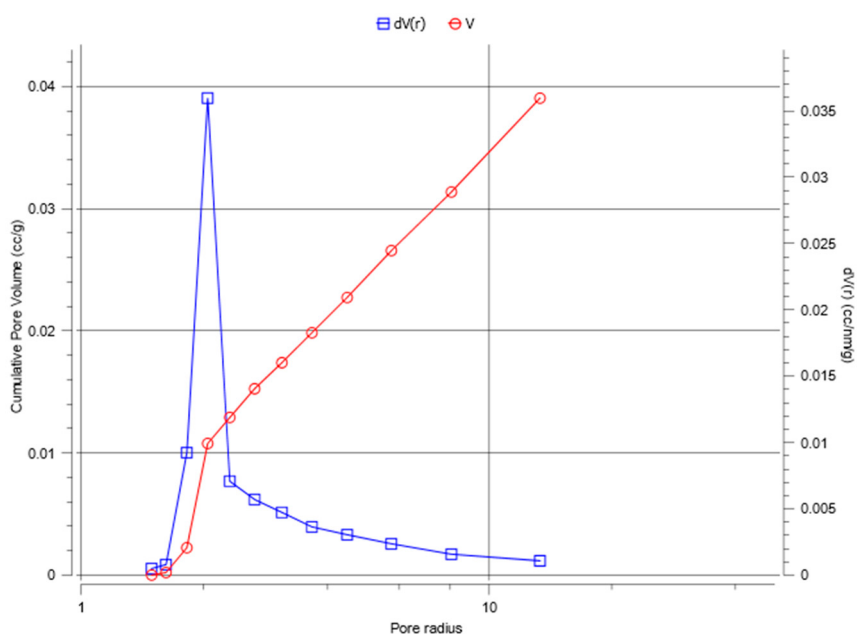

**Figure S3:** Pore size distribution and volume curves of the composite catalyst

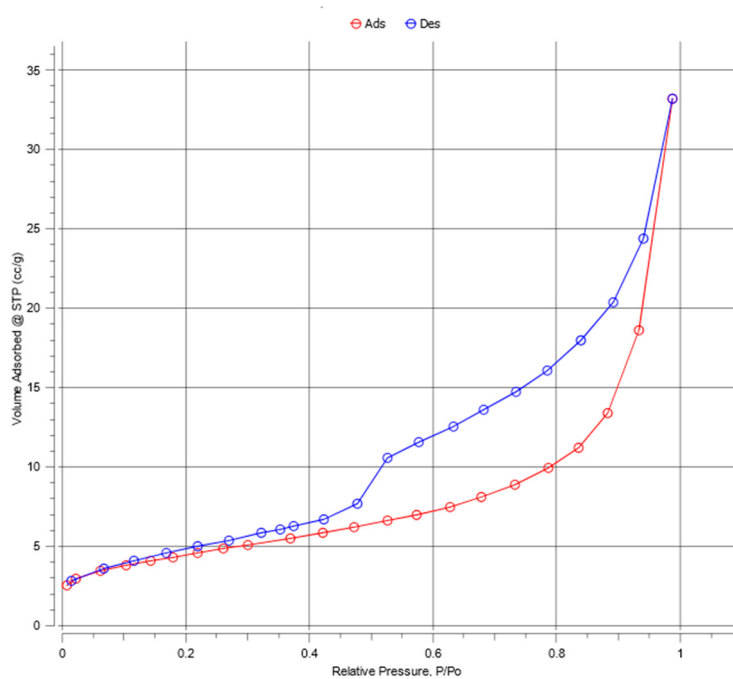

**Figure S4:** BET sorption\desorption curves of the composite catalyst

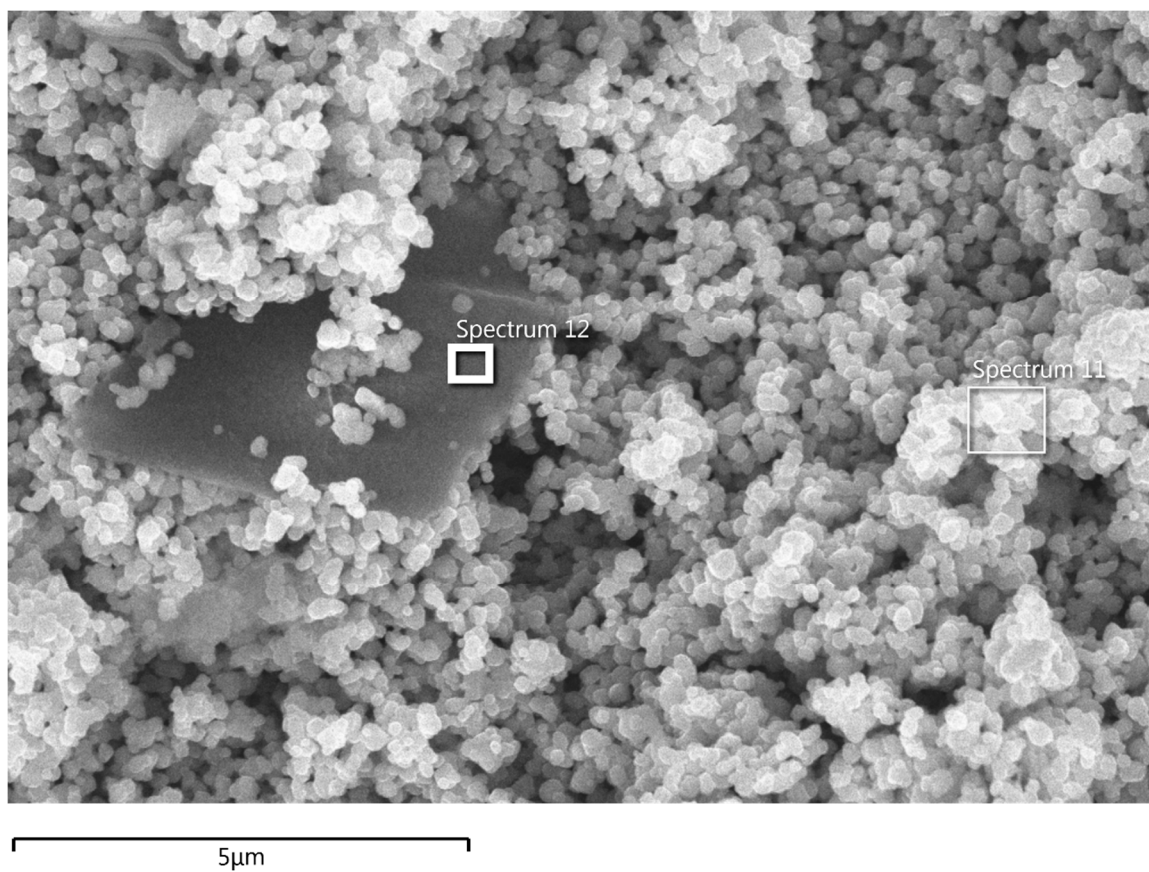

**Figure S5:** EDX elemental analysis sampling points

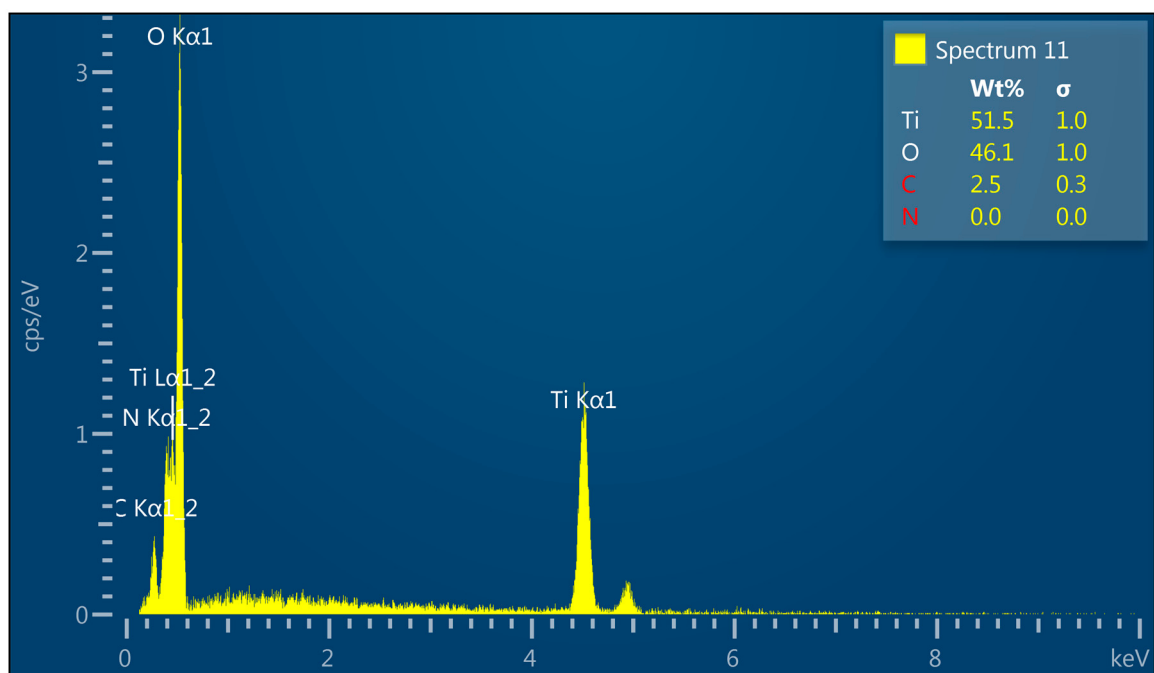

**Figure S6:** EDX elemental analysis spectrum 11

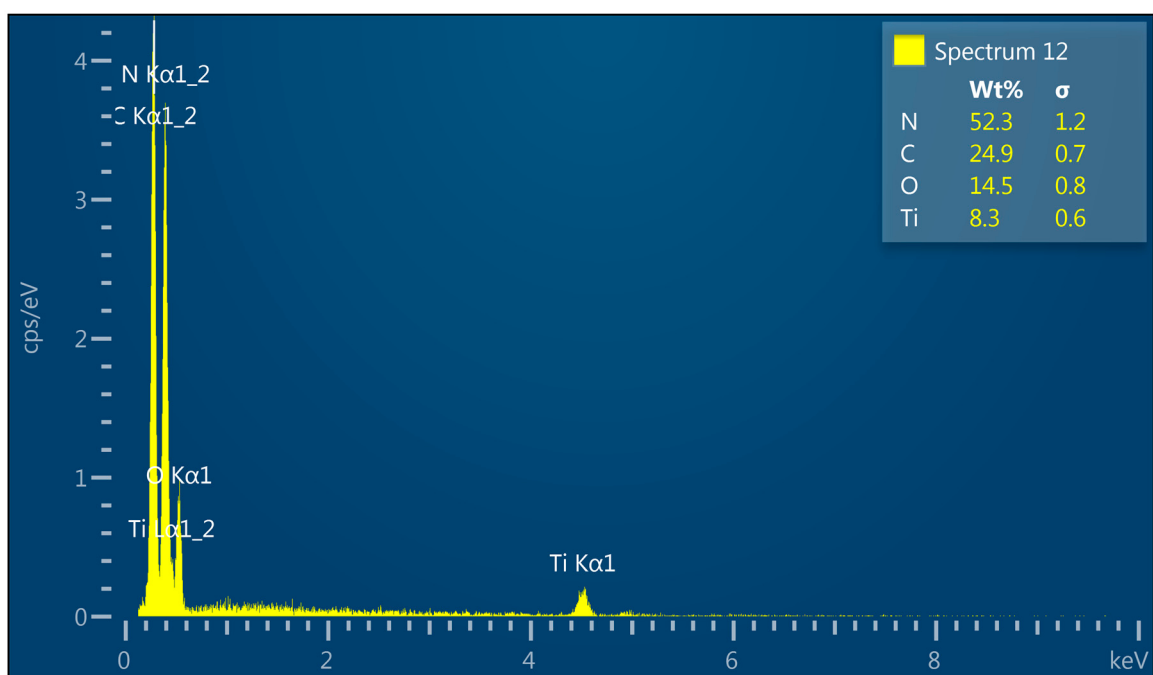

**Figure S7:** EDX elemental analysis spectrum 12

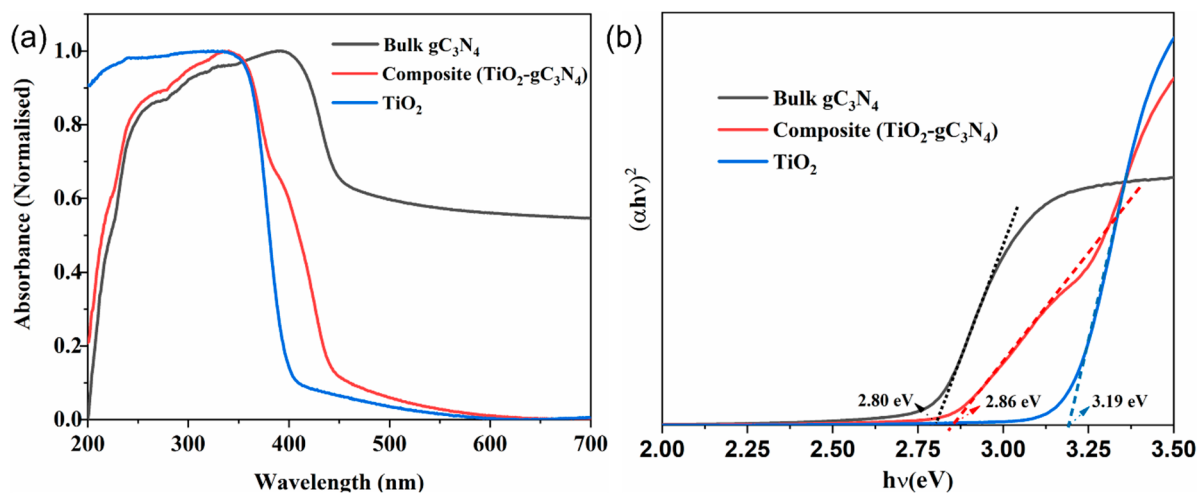

**Figure S8:** UV-visible DRS spectra and (a) plots of  $(\alpha h\nu)^{1/2}$  versus photon energy  $(h\nu)$  of the bulk  $\text{gC}_3\text{N}_4$ ,  $\text{TiO}_2$  and the composite (b).

**Table S2:** Summary of the Valence, conduction, and band gap of photocatalyst obtained by XPS analysis.

| Catalyst                        | Valence Band (eV) | Conduction Band (eV) | Band Gap (eV) |
|---------------------------------|-------------------|----------------------|---------------|
| Composite                       | 2.23              | -0.63                | 2.86          |
| TiO <sub>2</sub>                | 1.5               | -1.69                | 3.19          |
| g-C <sub>3</sub> N <sub>4</sub> | 1.97              | -0.83                | 2.8           |

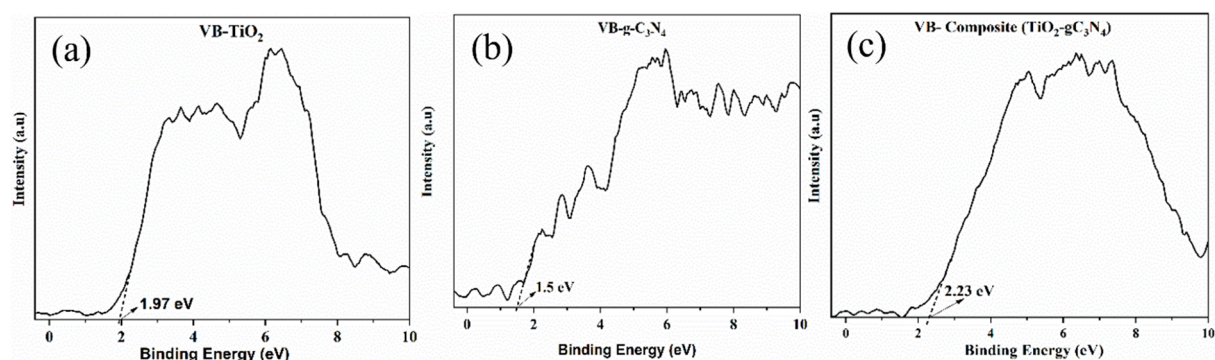

**Figure S9:** XPS Valence band spectra of (a) TiO<sub>2</sub> (b) composite (c) g-C<sub>3</sub>N<sub>4</sub>.

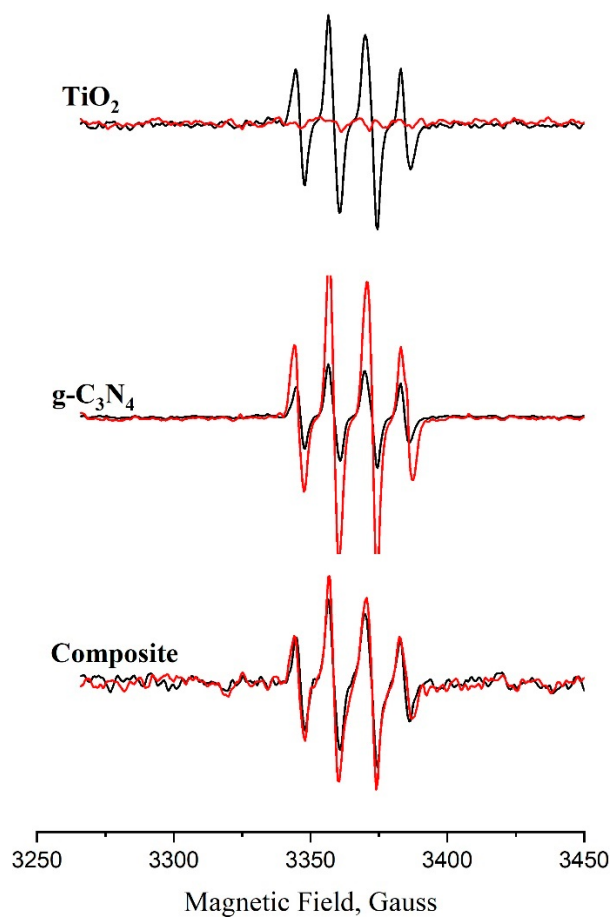

**Figure S10:** BMPO-OOH with (red line) and without (black line) DMSO signal from the suspension of  $\text{g-C}_3\text{N}_4$ ,  $\text{TiO}_2$  and the composite.
